# Supplementary material
Source: HighWire-hosted journal article supplement (https://informatics.bmj.com/content/32/1/e101381)
Supplement: inline-supplementary-material-1 [file inline-supplementary-material-1.pdf]

# Supplementary Information

## Assessing Validity of ICD-10 Administrative Data in Coding Comorbidities

Table S 1 The data extraction and chart review procedure for three cohorts. It includes the sampling strategies, review protocol, and inter-rater reliability.

|                         | 2003 cohort                                                                                                                                                                                | 2015 cohort                                                                                                                                     | 2022 cohort                                                                                                                                     |
|-------------------------|--------------------------------------------------------------------------------------------------------------------------------------------------------------------------------------------|-------------------------------------------------------------------------------------------------------------------------------------------------|-------------------------------------------------------------------------------------------------------------------------------------------------|
| Locations               | Four teaching hospitals in Alberta, Canada                                                                                                                                                 | Three teaching hospitals in Alberta, Canada                                                                                                     | Four teaching hospitals in Alberta, Canada                                                                                                      |
| Period                  | Patients discharged from January 1 to June 30, 2003.                                                                                                                                       | Patients discharged from January 1 to June 30, 2015.                                                                                            | Patients discharged from January 1, 2017, to June 30, 2022.                                                                                     |
| Sampling strategy       | Randomly sampled at least 1000 patients ( $\geq 18$ years) for each hospital.                                                                                                              | Randomly sampled at least 1000 patients ( $\geq 18$ years) for each hospital.                                                                   | Randomly sample patients ( $\geq 18$ years) with the available document of discharge summary.                                                   |
| Number of patients      | 4,008                                                                                                                                                                                      | 3,011                                                                                                                                           | 9,024                                                                                                                                           |
| Sample size calculation | $\alpha = 0.05$ ;<br>$power = 0.8$ .                                                                                                                                                       | $\alpha = 0.05$ ;<br>$power = 0.8$ .                                                                                                            | $\alpha = 0.05$ ;<br>$power = 0.8$ .                                                                                                            |
| Nurse reviewers         | 2                                                                                                                                                                                          | 6                                                                                                                                               | 6                                                                                                                                               |
| Review protocol         | A review guideline is decided by following the definitions of Charlson comorbidities. Reviewers went through training, agreement study, and full chart examination to complete the review. | Used review guideline for the 2003 cohort. Reviewers went through training, agreement study, and full chart examination to complete the review. | Used review guideline for the 2003 cohort. Reviewers went through training, agreement study, and full chart examination to complete the review. |
| Inter-rater reliability | 17 conditions had Kappa $> 0.81$ , 10 had Kappa $> 0.61$ , and 4 had moderate agreement Kappa $> 0.41$ .                                                                                   | Kappa $> 0.8$ .                                                                                                                                 | 15 conditions had high Kappa $> 0.72$ , and 2 had moderate agreement Kappa $> 0.63$ . <sup>1</sup>                                              |
| ICD coding algorithm    | Quan <i>et al.</i> (2005) <sup>2</sup>                                                                                                                                                     | Quan <i>et al.</i> (2005) <sup>2</sup>                                                                                                          | Quan <i>et al.</i> (2005) <sup>2</sup>                                                                                                          |

Note: For the 2003 and 2015 cohorts, patients were evenly sampled from each acute care facility. In contrast, the 2022 cohort was randomly sampled without hospital stratification, resulting in a distribution ratio of 0.40, 0.27, 0.19, and 0.14 across the facilities.

Table S 2 Detailed comparison of coding accuracy metrics for comorbidities by ICD-10-CA across three cohorts (2003, 2015, 2022).

| Comorbidity                 | 2003            |                 |         |         | 2015            |                 |         |         | 2022            |                 |         |         |
|-----------------------------|-----------------|-----------------|---------|---------|-----------------|-----------------|---------|---------|-----------------|-----------------|---------|---------|
|                             | Sensitivity (%) | Specificity (%) | PPV (%) | NPV (%) | Sensitivity (%) | Specificity (%) | PPV (%) | NPV (%) | Sensitivity (%) | Specificity (%) | PPV (%) | NPV (%) |
| Myocardial Infarction       | 62.0            | 99.3            | 93.0    | 94.7    | 26.3            | 99.8            | 94.0    | 91.1    | 39.8            | 99.3            | 87.6    | 93.1    |
| Congestive Heart Failure    | 68.9            | 99.3            | 90.2    | 97.2    | 56.0            | 99.2            | 89.7    | 94.7    | 52.8            | 98.9            | 83.7    | 95.1    |
| Peripheral Vascular Disease | 43.9            | 99.0            | 65.2    | 97.5    | 30.0            | 99.2            | 67.2    | 96.5    | 21.0            | 99.2            | 45.1    | 97.5    |
| Cerebrovascular Disease     | 46.9            | 99.2            | 83.2    | 95.5    | 25.3            | 99.7            | 91.9    | 90.9    | 31.3            | 98.7            | 73.2    | 92.9    |
| Dementia                    | 66.9            | 99.8            | 92.7    | 98.9    | 64.2            | 99.7            | 91.7    | 97.9    | 40.0            | 99.6            | 82.4    | 97.1    |
| Chronic Pulmonary Disease   | 53.1            | 99.0            | 90.6    | 92.3    | 42.9            | 98.5            | 83.5    | 90.9    | 21.1            | 99.4            | 89.2    | 85.3    |
| Rheumatic Disease           | 52.9            | 99.9            | 96.5    | 98.8    | 15.1            | 99.8            | 76.7    | 95.7    | 4.3             | 99.9            | 80.0    | 94.1    |
| Peptic Ulcer Disease        | 39.6            | 99.7            | 76.9    | 98.5    | 1.3             | 99.3            | 46.4    | 67.8    | 3.0             | 99.2            | 46.8    | 81.3    |
| Liver Disease               | 41.1            | 99.6            | 85.6    | 97.0    | 27.8            | 99.9            | 94.3    | 94.2    | 24.4            | 99.8            | 89.9    | 94.7    |
| Diabetes                    | 85.1            | 99.6            | 97.6    | 97.5    | 85.2            | 99.1            | 95.8    | 96.6    | 89.7            | 98.9            | 95.1    | 97.6    |
| Paralysis                   | 54.8            | 99.4            | 59.6    | 99.3    | 17.3            | 99.3            | 29.0    | 98.6    | 12.5            | 99.4            | 6.7     | 99.7    |
| Renal Disease               | 80.0            | 98.1            | 63.7    | 99.2    | 19.9            | 99.9            | 96.6    | 88.3    | 14.6            | 99.9            | 96.3    | 87.9    |
| Metastatic Cancer           | 80.8            | 99.4            | 86.7    | 99.1    | 64.3            | 99.4            | 83.3    | 98.3    | 74.8            | 98.9            | 80.6    | 98.5    |
| Cancer                      | 55.8            | 99.0            | 90.0    | 93.2    | 35.8            | 99.5            | 96.7    | 78.8    | 43.4            | 98.6            | 89.2    | 86.8    |
| Hypertension                | 68.8            | 97.8            | 93.1    | 87.9    | 52.5            | 98.1            | 96.3    | 68.7    | 29.5            | 97.5            | 90.5    | 63.4    |
| Psychoses                   | 56.9            | 99.8            | 90.4    | 98.7    | 57.8            | 99.6            | 81.2    | 98.7    | 10.0            | 100.0           | 69.2    | 99.1    |
| Depression                  | 45.5            | 99.4            | 91.2    | 93.1    | 22.6            | 99.0            | 83.2    | 85.3    | 5.9             | 99.7            | 71.8    | 90.0    |

Table S 3 Prevalence comparison of 2022 cohort, +1 prior year, +3 prior years, and +5 prior years of administrative data.

| Comorbidity                 | Chart data (%) | ICD-10 (%) |               |                |                |
|-----------------------------|----------------|------------|---------------|----------------|----------------|
|                             |                | 2022       | +1 prior year | +3 prior years | +5 prior years |
| Myocardial Infarction       | 11.0           | 5.0        | 6.4           | 7.2            | 7.5            |
| Congestive Heart Failure    | 9.7            | 6.1        | 8.8           | 9.8            | 10             |
| Peripheral Vascular Disease | 3.2            | 1.5        | 2.4           | 3              | 3.2            |
| Cerebrovascular Disease     | 9.9            | 4.3        | 5.7           | 6.5            | 6.8            |
| Dementia                    | 4.7            | 2.3        | 3.3           | 3.7            | 3.8            |
| Chronic Pulmonary Disease   | 17.8           | 4.2        | 6.1           | 6.9            | 7.1            |
| Rheumatic Disease           | 6.2            | 0.3        | 0.5           | 0.8            | 0.9            |
| Peptic Ulcer Disease        | 19.1           | 1.2        | 2.1           | 2.6            | 2.8            |
| Liver Disease               | 6.9            | 1.9        | 2.6           | 3              | 3.1            |
| Diabetes                    | 18.9           | 17.8       | 18.8          | 19.2           | 19.3           |
| Paralysis                   | 0.4            | 0.7        | 1.1           | 1.5            | 1.6            |
| Renal Disease               | 13.9           | 2.1        | 3.3           | 3.9            | 4.0            |
| Metastatic Cancer           | 5.6            | 5.2        | 6.1           | 6.3            | 6.4            |
| Cancer                      | 21.0           | 10.2       | 12.6          | 13.7           | 14.2           |
| Hypertension                | 44.4           | 14.5       | 21.2          | 25             | 26.6           |
| Psychoses                   | 1.0            | 0.1        | 0.7           | 0.8            | 0.9            |
| Depression                  | 10.6           | 0.9        | 2.6           | 3.6            | 3.9            |

Table S 4 Detailed comparison of coding accuracy metrics for comorbidities by ICD-10-CA across 2022 cohorts with 1 prior year, 3 prior years, and 5 prior years of administrative data.

| Comorbidity                 | +1 prior year |         |      |      | +3 prior years |         |      |      | +5 prior years |         |      |      |
|-----------------------------|---------------|---------|------|------|----------------|---------|------|------|----------------|---------|------|------|
|                             | Sens.         | Specif. | PPV  | NPV  | Sens.          | Specif. | PPV  | NPV  | Sens.          | Specif. | PPV  | NPV  |
| Myocardial Infarction       | 48.8          | 98.7    | 83.2 | 93.3 | 53.3           | 97.9    | 78.8 | 93.4 | 56.8           | 97.8    | 79.2 | 93.8 |
| Congestive Heart Failure    | 74.6          | 95.9    | 76   | 95.6 | 78.9           | 94.4    | 73   | 95.9 | 80.6           | 94.2    | 73.3 | 96.1 |
| Peripheral Vascular Disease | 35.9          | 97.9    | 44.7 | 96.9 | 42.7           | 96.8    | 41.6 | 96.9 | 47.8           | 96.5    | 43.0 | 97.1 |
| Cerebrovascular Disease     | 42.5          | 98.1    | 75.1 | 92.5 | 48.8           | 97.8    | 77.1 | 92.7 | 51.6           | 97.6    | 77.0 | 92.9 |
| Dementia                    | 60.8          | 98.6    | 73.9 | 97.5 | 64.7           | 98.1    | 70.6 | 97.5 | 66.1           | 97.9    | 69.3 | 97.6 |
| Chronic Pulmonary Disease   | 39.4          | 97.9    | 83.9 | 85.5 | 45.5           | 97.3    | 83.5 | 85.7 | 47.3           | 97.1    | 82.9 | 85.9 |
| Rheumatic Disease           | 8.3           | 99.7    | 70   | 93.3 | 14.2           | 99.6    | 72.3 | 93.4 | 16.8           | 99.5    | 75.6 | 93.5 |
| Peptic Ulcer Disease        | 7.5           | 97.7    | 46.6 | 79.7 | 9.0            | 96.7    | 44.1 | 78.7 | 9.5            | 96.3    | 42.8 | 78.3 |
| Liver Disease               | 43.6          | 99.1    | 82.5 | 94.6 | 48.7           | 98.4    | 76.2 | 94.7 | 50.6           | 98.2    | 75.2 | 94.9 |
| Diabetes                    | 94.9          | 97.6    | 92.1 | 98.5 | 95.8           | 96.6    | 89.6 | 98.7 | 95.9           | 96.2    | 88.6 | 98.7 |
| Paralysis                   | 23            | 98.4    | 7.3  | 99.6 | 45.7           | 97.7    | 11.3 | 99.6 | 54.2           | 97.4    | 12.2 | 99.7 |
| Renal Disease               | 29.2          | 98.8    | 84.8 | 85.5 | 33.3           | 98.4    | 84.6 | 84.4 | 34.5           | 98.2    | 84.4 | 84.3 |
| Metastatic Cancer           | 85.6          | 98.1    | 79.6 | 98.8 | 86.1           | 97.9    | 77.8 | 98.8 | 86.2           | 97.8    | 76.8 | 98.9 |
| Cancer                      | 45.7          | 88.9    | 45.1 | 89.1 | 51.3           | 88.2    | 47.6 | 89.7 | 54.3           | 88.2    | 49.2 | 90.2 |
| Hypertension                | 51.3          | 92.7    | 87.2 | 66.4 | 62.1           | 90.5    | 87.2 | 69.5 | 66.3           | 89.3    | 86.9 | 71.2 |

|            |      |      |      |      |      |      |      |      |      |      |      |      |
|------------|------|------|------|------|------|------|------|------|------|------|------|------|
| Psychoses  | 47.2 | 99.3 | 49   | 99.3 | 53.5 | 99.2 | 51.3 | 99.2 | 59.7 | 98.9 | 47.4 | 99.3 |
| Depression | 25.8 | 97.4 | 60.7 | 89.2 | 34.5 | 95.5 | 57   | 89.4 | 36.9 | 94.7 | 55.4 | 89.4 |

References

1. Wu, G. *et al.* Achieving high inter-rater reliability in establishing data labels: a retrospective chart review study. *BMJ Open Qual* 13, e002722 (2024).

2. Quan, H. *et al.* Coding algorithms for defining comorbidities in ICD-9-CM and ICD-10 administrative data. *Med Care* 43, 1130–1139 (2005).
